# Supplementary material
Source: publisher site journal article supplement (https://www.spandidos-publications.com/2618/downloadSupplementary)

Figure S1. Detection of transfection efficiency. Following CLC-7 siRNAs or NCsi transfection, expression of CLC-7 was measured using (A) western blotting and (B) the results were semi-quantified. \*\*P<0.01 vs. NCsi group. n=5. CLC-7, H(+)/Cl(-) exchange transporter 7; siRNA, small interfering RNA; NCsi, negative control siRNA; ns, not significant.

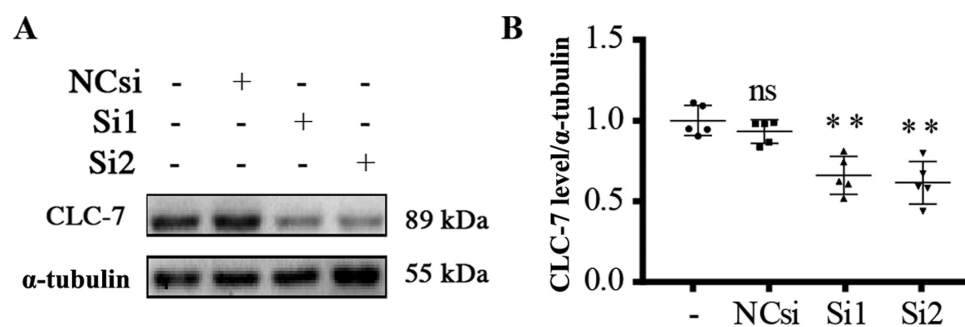

Supplement: Supplementary file 1 [file downloadSupplementary]
